# Supplementary material
Source: publisher site journal article supplement (https://www.dovepress.com/article/426249)

1 **Supplementary Figure S1** Associations between inflammatory markers' tertiles and clinical  
2 features

3 **Note:** (A, B, C) Comorbidities and inflammatory markers' distributions. (D) Pharmacological  
4 treatment and inflammatory markers' distributions. (E, F, G, H) Symptoms and inflammatory  
5 markers' distributions. (I, J) Post-COVID months and inflammatory markers' distributions. All  
6 features were significant in Chi-square and ANOVA test ( $p < 0.05$ ).

(A) Hypertension and SII

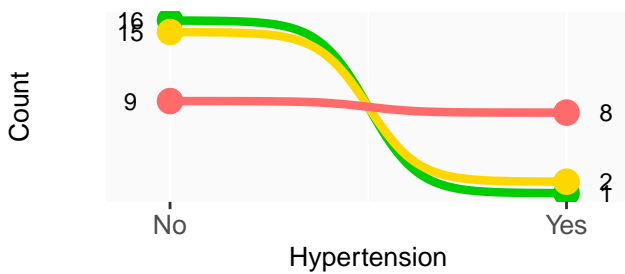

(B) Overweight and PLR

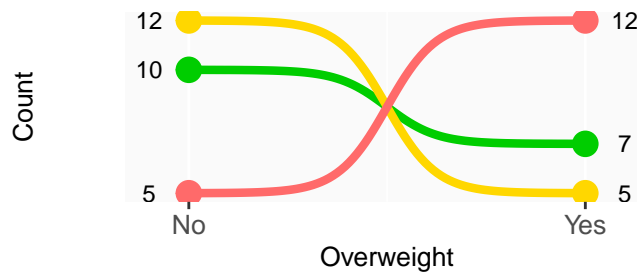

(C) Alcoholism and MLR

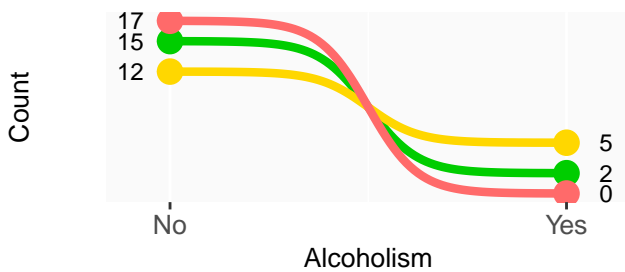

(D) Hydroxychloroquine and MLR

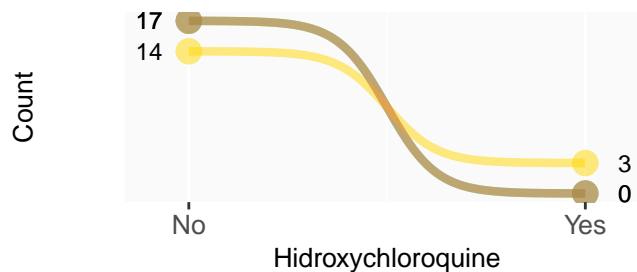

(E) Sudden onset and NLR

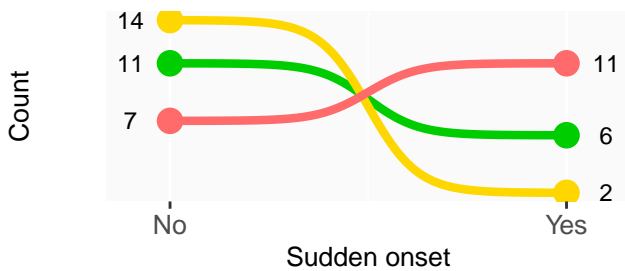

(F) Rhinorrhea and NLR

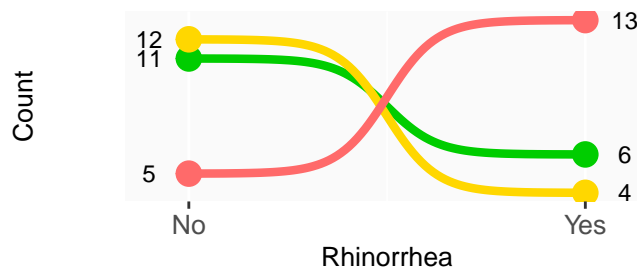

(G) Abdominal pain and NLR

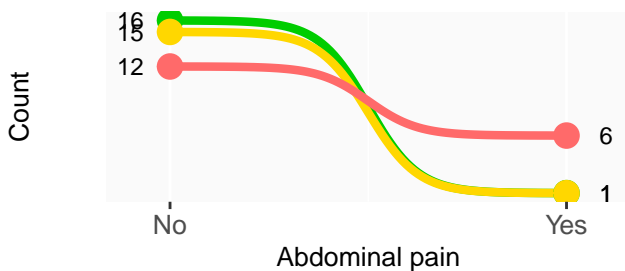

(H) Arthralgia and NLR

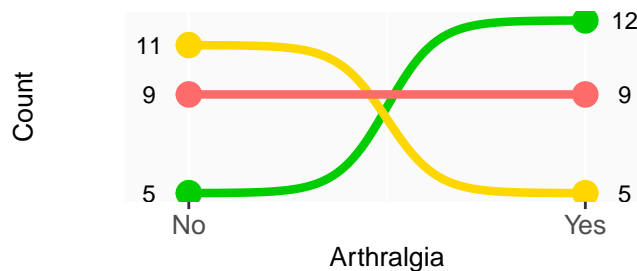

(I) Post-COVID months and PLR

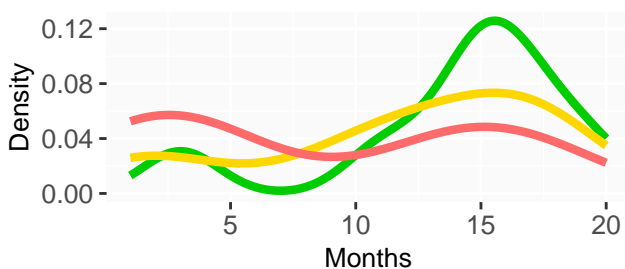

(J) Post-COVID months and SII

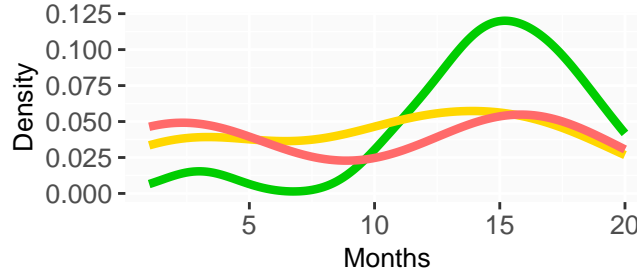

Inflammatory index tertiles

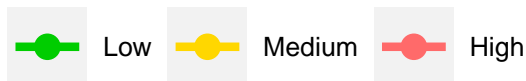

Supplement: Supplementary file 1 [file get_supplementary_file.php]
